# Supplementary material
Source: publisher figshare collection journal article supplement (https://acs.figshare.com/ndownloader/files/5058307)
Supplement: Supplementary file 1 [file 5058307]

 
data_d:\temp\ccdc\278629\a 
 
_audit_creation_method            SHELXL-97 
_chemical_name_systematic 
; 
 ? 
; 
_chemical_name_common             ? 
_chemical_melting_point           ? 
_chemical_formula_moiety       'C48 H52 K2 N4 O44 Zn7, 4(H2 O)'
_chemical_formula_sum 
 'C48 H60 K2 N4 O48 Zn7' 
_chemical_formula_weight          1996.79 
 
loop_ 
 _atom_type_symbol 
 _atom_type_description 
 _atom_type_scat_dispersion_real 
 _atom_type_scat_dispersion_imag 
 _atom_type_scat_source 
 'C'  'C'   0.0033   0.0016 
 'International Tables Vol C Tables 4.2.6.8 and 6.1.1.4' 
 'H'  'H'   0.0000   0.0000 
 'International Tables Vol C Tables 4.2.6.8 and 6.1.1.4' 
 'K'  'K'   0.2009   0.2494 
 'International Tables Vol C Tables 4.2.6.8 and 6.1.1.4' 
 'N'  'N'   0.0061   0.0033 
 'International Tables Vol C Tables 4.2.6.8 and 6.1.1.4' 
 'O'  'O'   0.0106   0.0060 
 'International Tables Vol C Tables 4.2.6.8 and 6.1.1.4' 
 'Zn'  'Zn'   0.2839   1.4301 
 'International Tables Vol C Tables 4.2.6.8 and 6.1.1.4' 
 
_symmetry_cell_setting            triclinic
_symmetry_space_group_name_H-M    P-1
_symmetry_space_group_name_Hall   '-P 1'
 
loop_ 
 _symmetry_equiv_pos_as_xyz 
 'x, y, z' 
 '-x, -y, -z' 
 
_cell_length_a                    7.7389(9) 
_cell_length_b                    10.602(1) 
_cell_length_c                    20.719(2) 
_cell_angle_alpha                 96.054(6) 
_cell_angle_beta                  90.734(3) 
_cell_angle_gamma                 103.936(6) 
_cell_volume                      1639.5(3) 
_cell_formula_units_Z             1 
_cell_measurement_temperature     173(2)
_cell_measurement_reflns_used     2697
_cell_measurement_theta_min       3.0724
_cell_measurement_theta_max       27.4835
 
_exptl_crystal_description        Prism
_exptl_crystal_colour             colorless
_exptl_crystal_size_max           0.10 
_exptl_crystal_size_mid           0.10 
_exptl_crystal_size_min           0.05 
_exptl_crystal_density_meas       ? 
_exptl_crystal_density_diffrn     2.022 
_exptl_crystal_density_method     'not measured' 
_exptl_crystal_F_000              1008 
_exptl_absorpt_coefficient_mu     2.766 
_exptl_absorpt_correction_type    Multi-scan
_exptl_absorpt_correction_T_min   0.778
_exptl_absorpt_correction_T_max   0.863
_exptl_absorpt_process_details    '(CrystalClear; Rigaku, 2000)'
 
_exptl_special_details 
; 
 ? 
; 
 
_diffrn_ambient_temperature       446(2) 
_diffrn_radiation_wavelength      0.71073 
_diffrn_radiation_type            MoK\a 
_diffrn_radiation_source          'fine-focus sealed tube' 
_diffrn_radiation_monochromator   graphite 
_diffrn_measurement_device_type   'Mercury CCD'
_diffrn_measurement_method        CCD_Profile_fitting
_diffrn_detector_area_resol_mean  14.6306
_diffrn_standards_number          ? 
_diffrn_standards_interval_count  ? 
_diffrn_standards_interval_time   ? 
_diffrn_standards_decay_%         ? 
_diffrn_reflns_number             12903 
_diffrn_reflns_av_R_equivalents   0.0562 
_diffrn_reflns_av_sigmaI/netI     0.1040 
_diffrn_reflns_limit_h_min        -10 
_diffrn_reflns_limit_h_max        10 
_diffrn_reflns_limit_k_min        -13 
_diffrn_reflns_limit_k_max        10 
_diffrn_reflns_limit_l_min        -26 
_diffrn_reflns_limit_l_max        26 
_diffrn_reflns_theta_min          3.07 
_diffrn_reflns_theta_max          27.48 
_reflns_number_total              7396 
_reflns_number_gt                 4738 
_reflns_threshold_expression      >2sigma(I) 
 
_computing_data_collection        'CrystalClear (Rigaku Corp., 2000)'
_computing_cell_refinement        'CrystalClear (Rigaku Corp., 2000)'
_computing_data_reduction         'CrystalClear (Rigaku Corp., 2000)'
_computing_structure_solution     'SHELXS-97 (Sheldrick, 1990)'
_computing_structure_refinement   'SHELXL-97 (Sheldrick, 1997)'
_computing_molecular_graphics     'SHELXL-97 (Sheldrick, 1997)'
_computing_publication_material   'SHELXTL (Bruker, 1997)'
 
_refine_special_details 
; 
 Refinement of F^2^ against ALL reflections.  The weighted R-factor wR and 
 goodness of fit S are based on F^2^, conventional R-factors R are based 
 on F, with F set to zero for negative F^2^. The threshold expression of 
 F^2^ > 2sigma(F^2^) is used only for calculating R-factors(gt) etc. and is 
 not relevant to the choice of reflections for refinement.  R-factors based 
 on F^2^ are statistically about twice as large as those based on F, and R- 
 factors based on ALL data will be even larger. 
; 
 
_refine_ls_structure_factor_coef  Fsqd  
_refine_ls_matrix_type            full 
_refine_ls_weighting_scheme       calc  
_refine_ls_weighting_details 
 'calc w=1/[\s^2^(Fo^2^)+(0.0406P)^2^+6.4628P] where P=(Fo^2^+2Fc^2^)/3' 
_atom_sites_solution_primary      direct 
_atom_sites_solution_secondary    difmap 
_atom_sites_solution_hydrogens    geom 
_refine_ls_hydrogen_treatment     constr 
_refine_ls_extinction_method      none 
_refine_ls_extinction_coef        ? 
_refine_ls_number_reflns          7396 
_refine_ls_number_parameters      493 
_refine_ls_number_restraints      0 
_refine_ls_R_factor_all           0.1185 
_refine_ls_R_factor_gt            0.0700 
_refine_ls_wR_factor_ref          0.1527 
_refine_ls_wR_factor_gt           0.1273 
_refine_ls_goodness_of_fit_ref    1.074 
_refine_ls_restrained_S_all       1.074 
_refine_ls_shift/su_max           0.001 
_refine_ls_shift/su_mean          0.000 
 
loop_ 
 _atom_site_label 
 _atom_site_type_symbol 
 _atom_site_fract_x 
 _atom_site_fract_y 
 _atom_site_fract_z 
 _atom_site_U_iso_or_equiv 
 _atom_site_adp_type 
 _atom_site_occupancy 
 _atom_site_symmetry_multiplicity 
 _atom_site_calc_flag 
 _atom_site_refinement_flags 
 _atom_site_disorder_assembly 
 _atom_site_disorder_group 
Zn1 Zn 0.02731(11) -0.22230(7) 0.21989(4) 0.02083(19) Uani 1 1 d . . . 
Zn2 Zn 0.0000 0.0000 0.0000 0.0309(3) Uani 1 2 d S . . 
Zn3 Zn 0.48603(11) 0.46382(8) 0.14134(4) 0.0230(2) Uani 1 1 d . . . 
Zn4 Zn 0.17324(11) 0.37661(8) 0.55496(4) 0.0247(2) Uani 1 1 d . . . 
K1 K 0.2234(2) -0.06485(17) 0.45350(9) 0.0388(4) Uani 1 1 d . . . 
O1 O -0.0493(6) -0.2699(5) 0.3086(2) 0.0275(11) Uani 1 1 d . . . 
O2 O -0.2271(7) -0.2447(5) 0.3905(2) 0.0292(12) Uani 1 1 d . . . 
O3 O -0.0207(7) -0.1651(5) 0.1309(2) 0.0295(12) Uani 1 1 d . . . 
O4 O -0.1623(7) -0.0469(5) 0.0770(2) 0.0343(13) Uani 1 1 d . . . 
O5 O 0.2244(7) -0.0371(5) 0.0518(3) 0.0364(13) Uani 1 1 d . . . 
O6 O -0.0539(8) -0.1910(5) -0.0433(3) 0.0463(16) Uani 1 1 d . . . 
O7 O 0.2539(6) 0.3006(5) 0.1512(2) 0.0269(11) Uani 1 1 d . . . 
O8 O 0.3682(8) 0.6075(6) 0.1215(3) 0.0433(15) Uani 1 1 d . . . 
O9 O 0.3571(6) 0.4466(4) 0.2336(2) 0.0260(11) Uani 1 1 d . . . 
O10 O 0.1866(7) 0.3477(4) 0.4597(2) 0.0281(12) Uani 1 1 d . . . 
O11 O 0.0509(7) 0.1415(5) 0.4712(2) 0.0326(12) Uani 1 1 d . . . 
O12 O -0.1050(7) 0.3370(5) 0.5549(2) 0.0308(12) Uani 1 1 d . . . 
O13 O 0.4812(7) 0.4431(6) 0.5619(3) 0.0422(14) Uani 1 1 d . . . 
O14 O 0.1797(7) 0.5312(5) 0.6150(3) 0.0343(13) Uani 1 1 d . . . 
O15 O 0.2975(7) 0.6905(5) 0.5547(2) 0.0375(14) Uani 1 1 d . . . 
O16 O 0.6758(7) 1.1028(5) 0.6690(2) 0.0320(12) Uani 1 1 d . . . 
O17 O 0.7301(6) 1.1152(5) 0.7757(2) 0.0289(12) Uani 1 1 d . . . 
O18 O 0.3848(8) 0.7467(5) 1.0191(2) 0.0418(14) Uani 1 1 d . . . 
O19 O 0.4581(7) 0.5914(5) 0.9513(2) 0.0354(13) Uani 1 1 d . . . 
O20 O 0.2719(6) 0.4222(5) 0.8242(2) 0.0274(11) Uani 1 1 d . . . 
O21 O -0.0188(6) 0.4069(4) 0.8174(2) 0.0241(11) Uani 1 1 d . . . 
O22 O 0.5355(8) -0.1422(6) 0.4813(3) 0.0489(16) Uani 1 1 d . . . 
O23 O 0.3303(7) 0.6314(5) 0.3388(3) 0.0397(14) Uani 1 1 d . . . 
O24 O 0.8740(12) 0.5919(8) 0.0173(4) 0.098(3) Uani 1 1 d . . . 
N1 N -0.1592(7) -0.0835(5) 0.2462(3) 0.0185(12) Uani 1 1 d . . . 
N2 N 0.3506(7) 0.6930(5) 0.8472(3) 0.0197(12) Uani 1 1 d . . . 
C1 C 0.1493(8) 0.2513(6) 0.2562(3) 0.0196(14) Uani 1 1 d . . . 
C2 C 0.1694(9) 0.2861(6) 0.3220(3) 0.0219(15) Uani 1 1 d . . . 
H2 H 0.2400 0.3676 0.3382 0.026 Uiso 1 1 calc R . . 
C3 C 0.0848(9) 0.2002(6) 0.3648(3) 0.0175(13) Uani 1 1 d . . . 
C4 C -0.0223(9) 0.0785(7) 0.3391(3) 0.0227(15) Uani 1 1 d . . . 
H4 H -0.0767 0.0199 0.3674 0.027 Uiso 1 1 calc R . . 
C5 C -0.0498(9) 0.0429(6) 0.2731(3) 0.0172(13) Uani 1 1 d . . . 
C6 C 0.0405(8) 0.1317(6) 0.2305(3) 0.0182(14) Uani 1 1 d . . . 
H6 H 0.0267 0.1098 0.1858 0.022 Uiso 1 1 calc R . . 
C7 C -0.2739(9) -0.1539(7) 0.2940(3) 0.0219(15) Uani 1 1 d . . . 
H7A H -0.3752 -0.2155 0.2713 0.026 Uiso 1 1 calc R . . 
H7B H -0.3188 -0.0918 0.3227 0.026 Uiso 1 1 calc R . . 
C8 C -0.1732(9) -0.2272(6) 0.3341(3) 0.0221(15) Uani 1 1 d . . . 
C9 C -0.2524(9) -0.0836(7) 0.1833(3) 0.0221(15) Uani 1 1 d . . . 
H9A H -0.2885 -0.0021 0.1831 0.027 Uiso 1 1 calc R . . 
H9B H -0.3593 -0.1544 0.1788 0.027 Uiso 1 1 calc R . . 
C10 C -0.1367(10) -0.0993(7) 0.1260(3) 0.0244(15) Uani 1 1 d . . . 
C11 C 0.2552(9) 0.3376(6) 0.2107(3) 0.0224(15) Uani 1 1 d . . . 
C12 C 0.1070(9) 0.2299(7) 0.4370(3) 0.0239(15) Uani 1 1 d . . . 
C13 C 0.3425(9) 0.7288(6) 0.6693(3) 0.0190(14) Uani 1 1 d . . . 
C14 C 0.4525(9) 0.8526(6) 0.6678(3) 0.0233(15) Uani 1 1 d . . . 
H14 H 0.4720 0.8881 0.6286 0.028 Uiso 1 1 calc R . . 
C15 C 0.5336(8) 0.9235(6) 0.7249(3) 0.0199(14) Uani 1 1 d . . . 
C16 C 0.5022(8) 0.8716(6) 0.7837(3) 0.0190(14) Uani 1 1 d . . . 
H16 H 0.5594 0.9191 0.8216 0.023 Uiso 1 1 calc R . . 
C17 C 0.3871(9) 0.7503(6) 0.7870(3) 0.0186(14) Uani 1 1 d . . . 
C18 C 0.3112(9) 0.6785(6) 0.7289(3) 0.0195(14) Uani 1 1 d . . . 
H18 H 0.2380 0.5952 0.7299 0.023 Uiso 1 1 calc R . . 
C19 C 0.2654(9) 0.6454(7) 0.6077(3) 0.0237(15) Uani 1 1 d . . . 
C20 C 0.6571(9) 1.0571(6) 0.7219(3) 0.0211(14) Uani 1 1 d . . . 
C21 C 0.4081(10) 0.7823(7) 0.9079(3) 0.0289(17) Uani 1 1 d . . . 
H21A H 0.3244 0.8363 0.9169 0.035 Uiso 1 1 calc R . . 
H21B H 0.5244 0.8394 0.9028 0.035 Uiso 1 1 calc R . . 
C22 C 0.4167(10) 0.7015(8) 0.9643(4) 0.0320(18) Uani 1 1 d . . . 
C23 C 0.1653(8) 0.6155(6) 0.8499(3) 0.0203(14) Uani 1 1 d . . . 
H23A H 0.0894 0.6497 0.8222 0.024 Uiso 1 1 calc R . . 
H23B H 0.1266 0.6267 0.8940 0.024 Uiso 1 1 calc R . . 
C24 C 0.1404(8) 0.4725(6) 0.8291(3) 0.0194(14) Uani 1 1 d . . . 
H22A H 0.5537 -0.1875 0.4461 0.023 Uiso 1 1 d R . . 
H22B H 0.5199 -0.1964 0.5105 0.023 Uiso 1 1 d R . . 
H5 H 0.3901 0.6699 0.0970 0.023 Uiso 1 1 d R . . 
H8 H 0.2721 0.6010 0.1414 0.023 Uiso 1 1 d R . . 
H13A H 0.5481 0.4276 0.5925 0.023 Uiso 1 1 d R . . 
H12A H -0.1709 0.3589 0.5267 0.023 Uiso 1 1 d R . . 
H12B H -0.1627 0.2608 0.5663 0.023 Uiso 1 1 d R . . 
H13B H 0.4909 0.3894 0.5271 0.023 Uiso 1 1 d R . . 
H5B H 0.2853 -0.0930 0.0325 0.023 Uiso 1 1 d R . . 
H5A H 0.1578 -0.0905 0.0775 0.023 Uiso 1 1 d R . . 
H6A H -0.0621 -0.2677 -0.0304 0.023 Uiso 1 1 d R . . 
H6B H -0.1318 -0.2075 -0.0779 0.023 Uiso 1 1 d R . . 
H23C H 0.2139 0.6096 0.3352 0.023 Uiso 1 1 d R . . 
H23D H 0.3558 0.7140 0.3320 0.023 Uiso 1 1 d R . . 
H24A H 0.9392 0.6267 0.0537 0.023 Uiso 1 1 d R . . 
H24B H 0.8617 0.5072 0.0143 0.023 Uiso 1 1 d R . . 
 
loop_ 
 _atom_site_aniso_label 
 _atom_site_aniso_U_11 
 _atom_site_aniso_U_22 
 _atom_site_aniso_U_33 
 _atom_site_aniso_U_23 
 _atom_site_aniso_U_13 
 _atom_site_aniso_U_12 
Zn1 0.0220(4) 0.0187(4) 0.0206(4) 0.0018(3) 0.0016(3) 0.0027(3) 
Zn2 0.0390(8) 0.0304(7) 0.0213(6) 0.0018(5) 0.0017(5) 0.0048(6) 
Zn3 0.0226(4) 0.0229(4) 0.0238(4) 0.0062(3) 0.0048(3) 0.0045(3) 
Zn4 0.0350(5) 0.0207(4) 0.0172(4) 0.0022(3) -0.0004(4) 0.0045(4) 
K1 0.0416(11) 0.0298(9) 0.0442(11) 0.0061(8) 0.0133(9) 0.0058(8) 
O1 0.028(3) 0.031(3) 0.025(3) 0.010(2) 0.005(2) 0.009(2) 
O2 0.040(3) 0.034(3) 0.019(3) 0.008(2) 0.008(2) 0.016(2) 
O3 0.037(3) 0.035(3) 0.020(3) 0.005(2) 0.007(2) 0.015(2) 
O4 0.038(3) 0.049(3) 0.020(3) 0.013(2) 0.004(2) 0.016(3) 
O5 0.037(3) 0.037(3) 0.033(3) 0.004(2) 0.005(3) 0.005(3) 
O6 0.072(4) 0.031(3) 0.032(3) -0.001(2) -0.018(3) 0.008(3) 
O7 0.029(3) 0.031(3) 0.020(3) 0.007(2) 0.004(2) 0.004(2) 
O8 0.047(4) 0.050(4) 0.048(4) 0.027(3) 0.019(3) 0.030(3) 
O9 0.030(3) 0.023(3) 0.022(3) 0.002(2) 0.003(2) 0.002(2) 
O10 0.037(3) 0.020(3) 0.023(3) 0.0031(19) 0.004(2) -0.004(2) 
O11 0.049(3) 0.026(3) 0.022(3) 0.004(2) 0.003(2) 0.006(2) 
O12 0.034(3) 0.029(3) 0.029(3) 0.004(2) -0.001(2) 0.006(2) 
O13 0.037(3) 0.058(4) 0.034(3) 0.014(3) 0.005(3) 0.013(3) 
O14 0.041(3) 0.018(3) 0.036(3) -0.008(2) 0.005(3) -0.004(2) 
O15 0.045(3) 0.037(3) 0.020(3) 0.003(2) -0.007(2) -0.009(3) 
O16 0.040(3) 0.027(3) 0.026(3) 0.010(2) 0.002(2) -0.001(2) 
O17 0.027(3) 0.022(3) 0.031(3) 0.000(2) 0.004(2) -0.006(2) 
O18 0.069(4) 0.046(4) 0.017(3) 0.005(2) 0.010(3) 0.025(3) 
O19 0.051(4) 0.030(3) 0.030(3) 0.010(2) 0.011(3) 0.016(3) 
O20 0.027(3) 0.022(3) 0.030(3) -0.003(2) 0.002(2) 0.003(2) 
O21 0.019(2) 0.018(2) 0.031(3) -0.002(2) 0.002(2) -0.0014(19) 
O22 0.057(4) 0.035(3) 0.052(4) -0.003(3) 0.004(3) 0.011(3) 
O23 0.040(3) 0.030(3) 0.048(4) 0.008(3) 0.003(3) 0.006(3) 
O24 0.114(7) 0.069(6) 0.093(7) 0.045(5) -0.021(5) -0.027(5) 
N1 0.022(3) 0.018(3) 0.015(3) 0.002(2) 0.004(2) 0.004(2) 
N2 0.024(3) 0.018(3) 0.015(3) 0.003(2) 0.002(2) 0.000(2) 
C1 0.016(3) 0.021(3) 0.025(4) 0.009(3) 0.009(3) 0.008(3) 
C2 0.028(4) 0.014(3) 0.023(4) 0.002(3) 0.001(3) 0.003(3) 
C3 0.023(4) 0.016(3) 0.014(3) 0.001(2) 0.001(3) 0.007(3) 
C4 0.022(4) 0.024(4) 0.022(4) 0.004(3) 0.002(3) 0.005(3) 
C5 0.023(3) 0.016(3) 0.012(3) 0.003(2) 0.000(3) 0.003(3) 
C6 0.018(3) 0.024(4) 0.013(3) 0.001(3) 0.003(3) 0.007(3) 
C7 0.015(3) 0.027(4) 0.022(4) 0.005(3) 0.004(3) 0.000(3) 
C8 0.031(4) 0.015(3) 0.019(4) 0.003(3) -0.002(3) 0.001(3) 
C9 0.022(4) 0.021(4) 0.023(4) 0.005(3) -0.002(3) 0.004(3) 
C10 0.030(4) 0.024(4) 0.020(4) 0.001(3) -0.002(3) 0.011(3) 
C11 0.022(4) 0.020(4) 0.029(4) 0.011(3) 0.004(3) 0.007(3) 
C12 0.024(4) 0.029(4) 0.020(4) 0.003(3) 0.003(3) 0.009(3) 
C13 0.027(4) 0.020(3) 0.009(3) -0.005(2) -0.001(3) 0.005(3) 
C14 0.032(4) 0.024(4) 0.016(3) 0.005(3) 0.004(3) 0.009(3) 
C15 0.016(3) 0.016(3) 0.026(4) 0.002(3) 0.001(3) 0.000(3) 
C16 0.020(3) 0.019(3) 0.017(3) 0.000(3) -0.004(3) 0.003(3) 
C17 0.019(3) 0.020(3) 0.020(3) 0.004(3) 0.004(3) 0.010(3) 
C18 0.022(3) 0.012(3) 0.025(4) 0.006(3) 0.003(3) 0.002(3) 
C19 0.026(4) 0.024(4) 0.020(4) -0.001(3) 0.000(3) 0.003(3) 
C20 0.020(3) 0.018(3) 0.024(4) -0.001(3) 0.000(3) 0.001(3) 
C21 0.032(4) 0.029(4) 0.025(4) 0.005(3) 0.001(3) 0.007(3) 
C22 0.033(4) 0.032(4) 0.029(4) 0.005(3) -0.001(3) 0.003(3) 
C23 0.016(3) 0.024(4) 0.020(3) 0.003(3) 0.006(3) 0.003(3) 
C24 0.026(4) 0.009(3) 0.022(4) 0.010(2) 0.004(3) -0.001(3) 
 
_geom_special_details 
; 
 All esds (except the esd in the dihedral angle between two l.s. planes) 
 are estimated using the full covariance matrix.  The cell esds are taken 
 into account individually in the estimation of esds in distances, angles 
 and torsion angles; correlations between esds in cell parameters are only 
 used when they are defined by crystal symmetry.  An approximate (isotropic) 
 treatment of cell esds is used for estimating esds involving l.s. planes. 
; 
 
loop_ 
 _geom_bond_atom_site_label_1 
 _geom_bond_atom_site_label_2 
 _geom_bond_distance 
 _geom_bond_site_symmetry_2 
 _geom_bond_publ_flag 
Zn1 O17 1.942(5) 2_666 ? 
Zn1 O21 2.012(5) 2_556 ? 
Zn1 O1 2.016(5) . ? 
Zn1 O3 2.058(5) . ? 
Zn1 N1 2.328(5) . ? 
Zn2 O6 2.069(5) . ? 
Zn2 O4 2.071(5) . ? 
Zn2 O5 2.166(5) . ? 
Zn3 O8 2.028(5) . ? 
Zn3 O19 2.030(5) 2_666 ? 
Zn3 O20 2.043(5) 2_666 ? 
Zn3 O9 2.172(5) . ? 
Zn3 O7 2.203(5) . ? 
Zn3 N2 2.347(5) 2_666 ? 
Zn4 O14 1.941(5) . ? 
Zn4 O10 1.973(5) . ? 
Zn4 O2 2.002(5) 2_556 ? 
Zn4 O12 2.092(5) . ? 
Zn4 O13 2.315(6) . ? 
K1 O11 2.669(5) 2_556 ? 
K1 O16 2.684(5) 2_666 ? 
K1 O22 2.731(6) 2_656 ? 
K1 O12 2.795(5) 2_556 ? 
K1 O22 2.803(6) . ? 
K1 O11 2.820(6) . ? 
O1 C8 1.255(8) . ? 
O2 C8 1.262(8) . ? 
O2 Zn4 2.002(5) 2_556 ? 
O3 C10 1.271(8) . ? 
O4 C10 1.244(8) . ? 
O5 H5B 0.9068 . ? 
O5 H5A 0.8947 . ? 
O6 H6A 0.8710 . ? 
O6 H6B 0.9044 . ? 
O7 C11 1.252(8) . ? 
O8 H5 0.8626 . ? 
O8 H8 0.8464 . ? 
O9 C11 1.271(8) . ? 
O10 C12 1.288(8) . ? 
O11 C12 1.233(8) . ? 
O12 H12A 0.8555 . ? 
O12 H12B 0.8818 . ? 
O13 H13A 0.8660 . ? 
O13 H13B 0.8852 . ? 
O14 C19 1.258(8) . ? 
O15 C19 1.247(8) . ? 
O16 C20 1.240(8) . ? 
O17 C20 1.271(8) . ? 
O18 C22 1.236(9) . ? 
O19 C22 1.286(9) . ? 
O20 C24 1.258(8) . ? 
O21 C24 1.267(7) . ? 
O22 H22A 0.8640 . ? 
O22 H22B 0.8673 . ? 
O23 H23C 0.8747 . ? 
O23 H23D 0.8771 . ? 
O24 H24A 0.8951 . ? 
O24 H24B 0.8760 . ? 
N1 C5 1.451(8) . ? 
N1 C7 1.479(8) . ? 
N1 C9 1.481(8) . ? 
N2 C17 1.446(8) . ? 
N2 C23 1.476(8) . ? 
N2 C21 1.486(9) . ? 
C1 C2 1.372(9) . ? 
C1 C6 1.389(9) . ? 
C1 C11 1.496(8) . ? 
C2 C3 1.394(9) . ? 
C2 H2 0.9300 . ? 
C3 C4 1.402(9) . ? 
C3 C12 1.494(9) . ? 
C4 C5 1.379(9) . ? 
C4 H4 0.9300 . ? 
C5 C6 1.423(8) . ? 
C6 H6 0.9300 . ? 
C7 C8 1.521(9) . ? 
C7 H7A 0.9700 . ? 
C7 H7B 0.9700 . ? 
C9 C10 1.515(10) . ? 
C9 H9A 0.9700 . ? 
C9 H9B 0.9700 . ? 
C13 C14 1.385(9) . ? 
C13 C18 1.398(9) . ? 
C13 C19 1.502(9) . ? 
C14 C15 1.387(9) . ? 
C14 H14 0.9300 . ? 
C15 C16 1.391(9) . ? 
C15 C20 1.513(9) . ? 
C16 C17 1.385(9) . ? 
C16 H16 0.9300 . ? 
C17 C18 1.395(9) . ? 
C18 H18 0.9300 . ? 
C21 C22 1.531(10) . ? 
C21 H21A 0.9700 . ? 
C21 H21B 0.9700 . ? 
C23 C24 1.497(9) . ? 
C23 H23A 0.9700 . ? 
C23 H23B 0.9700 . ? 
 
loop_ 
 _geom_angle_atom_site_label_1 
 _geom_angle_atom_site_label_2 
 _geom_angle_atom_site_label_3 
 _geom_angle 
 _geom_angle_site_symmetry_1 
 _geom_angle_site_symmetry_3 
 _geom_angle_publ_flag 
O17 Zn1 O21 110.7(2) 2_666 2_556 ? 
O17 Zn1 O1 110.8(2) 2_666 . ? 
O21 Zn1 O1 94.9(2) 2_556 . ? 
O17 Zn1 O3 91.3(2) 2_666 . ? 
O21 Zn1 O3 93.3(2) 2_556 . ? 
O1 Zn1 O3 151.8(2) . . ? 
O17 Zn1 N1 107.4(2) 2_666 . ? 
O21 Zn1 N1 141.08(19) 2_556 . ? 
O1 Zn1 N1 78.56(19) . . ? 
O3 Zn1 N1 78.13(19) . . ? 
O6 Zn2 O6 180 . 2 ? 
O6 Zn2 O4 86.3(2) . 2 ? 
O6 Zn2 O4 93.7(2) 2 2 ? 
O6 Zn2 O4 93.7(2) . . ? 
O6 Zn2 O4 86.3(2) 2 . ? 
O4 Zn2 O4 180 2 . ? 
O6 Zn2 O5 91.7(2) . 2 ? 
O6 Zn2 O5 88.3(2) 2 2 ? 
O4 Zn2 O5 91.03(19) 2 2 ? 
O4 Zn2 O5 88.97(19) . 2 ? 
O6 Zn2 O5 88.3(2) . . ? 
O6 Zn2 O5 91.7(2) 2 . ? 
O4 Zn2 O5 88.97(19) 2 . ? 
O4 Zn2 O5 91.03(19) . . ? 
O5 Zn2 O5 180 2 . ? 
O8 Zn3 O19 97.3(2) . 2_666 ? 
O8 Zn3 O20 98.7(2) . 2_666 ? 
O19 Zn3 O20 101.1(2) 2_666 2_666 ? 
O8 Zn3 O9 91.6(2) . . ? 
O19 Zn3 O9 157.4(2) 2_666 . ? 
O20 Zn3 O9 98.05(19) 2_666 . ? 
O8 Zn3 O7 101.9(2) . . ? 
O19 Zn3 O7 97.9(2) 2_666 . ? 
O20 Zn3 O7 149.89(18) 2_666 . ? 
O9 Zn3 O7 59.80(18) . . ? 
O8 Zn3 N2 172.0(2) . 2_666 ? 
O19 Zn3 N2 76.37(19) 2_666 2_666 ? 
O20 Zn3 N2 78.10(19) 2_666 2_666 ? 
O9 Zn3 N2 96.04(18) . 2_666 ? 
O7 Zn3 N2 83.98(18) . 2_666 ? 
O14 Zn4 O10 132.9(2) . . ? 
O14 Zn4 O2 105.4(2) . 2_556 ? 
O10 Zn4 O2 119.4(2) . 2_556 ? 
O14 Zn4 O12 87.9(2) . . ? 
O10 Zn4 O12 95.3(2) . . ? 
O2 Zn4 O12 102.6(2) 2_556 . ? 
O14 Zn4 O13 85.5(2) . . ? 
O10 Zn4 O13 88.5(2) . . ? 
O2 Zn4 O13 80.0(2) 2_556 . ? 
O12 Zn4 O13 173.4(2) . . ? 
O11 K1 O16 141.17(17) 2_556 2_666 ? 
O11 K1 O22 109.20(18) 2_556 2_656 ? 
O16 K1 O22 109.07(18) 2_666 2_656 ? 
O11 K1 O12 67.62(16) 2_556 2_556 ? 
O16 K1 O12 85.94(15) 2_666 2_556 ? 
O22 K1 O12 142.12(17) 2_656 2_556 ? 
O11 K1 O22 116.65(18) 2_556 . ? 
O16 K1 O22 82.23(18) 2_666 . ? 
O22 K1 O22 70.9(2) 2_656 . ? 
O12 K1 O22 77.30(16) 2_556 . ? 
O11 K1 O11 73.07(16) 2_556 . ? 
O16 K1 O11 112.04(15) 2_666 . ? 
O22 K1 O11 73.81(17) 2_656 . ? 
O12 K1 O11 133.69(16) 2_556 . ? 
O22 K1 O11 144.62(17) . . ? 
C8 O1 Zn1 119.0(4) . . ? 
C8 O2 Zn4 125.8(5) . 2_556 ? 
C10 O3 Zn1 118.6(4) . . ? 
C10 O4 Zn2 130.2(5) . . ? 
Zn2 O5 H5B 119.5 . . ? 
Zn2 O5 H5A 95.0 . . ? 
H5B O5 H5A 99.0 . . ? 
Zn2 O6 H6A 136.2 . . ? 
Zn2 O6 H6B 113.9 . . ? 
H6A O6 H6B 103.7 . . ? 
C11 O7 Zn3 89.4(4) . . ? 
Zn3 O8 H5 135.6 . . ? 
Zn3 O8 H8 110.2 . . ? 
H5 O8 H8 114.1 . . ? 
C11 O9 Zn3 90.3(4) . . ? 
C12 O10 Zn4 111.8(4) . . ? 
C12 O11 K1 138.6(5) . 2_556 ? 
C12 O11 K1 113.7(5) . . ? 
K1 O11 K1 106.93(16) 2_556 . ? 
Zn4 O12 K1 105.7(2) . 2_556 ? 
Zn4 O12 H12A 125.1 . . ? 
K1 O12 H12A 104.2 2_556 . ? 
Zn4 O12 H12B 117.6 . . ? 
H12A O12 H12B 107.7 . . ? 
Zn4 O13 H13A 125.1 . . ? 
Zn4 O13 H13B 92.0 . . ? 
H13A O13 H13B 106.7 . . ? 
C19 O14 Zn4 125.2(5) . . ? 
C20 O16 K1 144.8(5) . 2_666 ? 
C20 O17 Zn1 120.7(5) . 2_666 ? 
C22 O19 Zn3 118.9(5) . 2_666 ? 
C24 O20 Zn3 117.3(4) . 2_666 ? 
C24 O21 Zn1 111.1(4) . 2_556 ? 
K1 O22 K1 109.1(2) 2_656 . ? 
K1 O22 H22A 126.0 2_656 . ? 
K1 O22 H22A 104.5 . . ? 
K1 O22 H22B 100.2 2_656 . ? 
K1 O22 H22B 111.9 . . ? 
H22A O22 H22B 104.9 . . ? 
H23C O23 H23D 102.5 . . ? 
H24A O24 H24B 107.4 . . ? 
C5 N1 C7 113.7(5) . . ? 
C5 N1 C9 114.8(5) . . ? 
C7 N1 C9 113.9(5) . . ? 
C5 N1 Zn1 108.3(4) . . ? 
C7 N1 Zn1 101.6(4) . . ? 
C9 N1 Zn1 102.9(4) . . ? 
C17 N2 C23 113.3(5) . . ? 
C17 N2 C21 116.2(5) . . ? 
C23 N2 C21 111.6(5) . . ? 
C17 N2 Zn3 111.3(4) . 2_666 ? 
C23 N2 Zn3 102.1(4) . 2_666 ? 
C21 N2 Zn3 100.7(4) . 2_666 ? 
C2 C1 C6 121.0(6) . . ? 
C2 C1 C11 120.2(6) . . ? 
C6 C1 C11 118.6(6) . . ? 
C1 C2 C3 120.5(6) . . ? 
C1 C2 H2 119.8 . . ? 
C3 C2 H2 119.8 . . ? 
C2 C3 C4 118.5(6) . . ? 
C2 C3 C12 123.2(6) . . ? 
C4 C3 C12 118.3(6) . . ? 
C5 C4 C3 122.1(6) . . ? 
C5 C4 H4 118.9 . . ? 
C3 C4 H4 118.9 . . ? 
C4 C5 C6 118.1(6) . . ? 
C4 C5 N1 122.3(6) . . ? 
C6 C5 N1 119.6(6) . . ? 
C1 C6 C5 119.7(6) . . ? 
C1 C6 H6 120.2 . . ? 
C5 C6 H6 120.2 . . ? 
N1 C7 C8 111.7(5) . . ? 
N1 C7 H7A 109.3 . . ? 
C8 C7 H7A 109.3 . . ? 
N1 C7 H7B 109.3 . . ? 
C8 C7 H7B 109.3 . . ? 
H7A C7 H7B 107.9 . . ? 
O1 C8 O2 125.0(6) . . ? 
O1 C8 C7 118.6(6) . . ? 
O2 C8 C7 116.3(6) . . ? 
N1 C9 C10 112.3(5) . . ? 
N1 C9 H9A 109.1 . . ? 
C10 C9 H9A 109.1 . . ? 
N1 C9 H9B 109.1 . . ? 
C10 C9 H9B 109.1 . . ? 
H9A C9 H9B 107.9 . . ? 
O4 C10 O3 124.2(7) . . ? 
O4 C10 C9 117.4(6) . . ? 
O3 C10 C9 118.4(6) . . ? 
O7 C11 O9 119.6(6) . . ? 
O7 C11 C1 121.0(6) . . ? 
O9 C11 C1 119.2(6) . . ? 
O11 C12 O10 123.8(7) . . ? 
O11 C12 C3 119.0(6) . . ? 
O10 C12 C3 117.2(6) . . ? 
C14 C13 C18 119.2(6) . . ? 
C14 C13 C19 121.0(6) . . ? 
C18 C13 C19 119.7(6) . . ? 
C13 C14 C15 119.9(6) . . ? 
C13 C14 H14 120.0 . . ? 
C15 C14 H14 120.0 . . ? 
C14 C15 C16 120.1(6) . . ? 
C14 C15 C20 119.1(6) . . ? 
C16 C15 C20 120.8(6) . . ? 
C17 C16 C15 121.2(6) . . ? 
C17 C16 H16 119.4 . . ? 
C15 C16 H16 119.4 . . ? 
C16 C17 C18 117.9(6) . . ? 
C16 C17 N2 122.9(6) . . ? 
C18 C17 N2 119.1(6) . . ? 
C17 C18 C13 121.6(6) . . ? 
C17 C18 H18 119.2 . . ? 
C13 C18 H18 119.2 . . ? 
O15 C19 O14 125.9(7) . . ? 
O15 C19 C13 119.0(6) . . ? 
O14 C19 C13 115.0(6) . . ? 
O16 C20 O17 125.2(6) . . ? 
O16 C20 C15 119.0(6) . . ? 
O17 C20 C15 115.7(6) . . ? 
N2 C21 C22 109.4(6) . . ? 
N2 C21 H21A 109.8 . . ? 
C22 C21 H21A 109.8 . . ? 
N2 C21 H21B 109.8 . . ? 
C22 C21 H21B 109.8 . . ? 
H21A C21 H21B 108.2 . . ? 
O18 C22 O19 124.6(7) . . ? 
O18 C22 C21 118.0(7) . . ? 
O19 C22 C21 117.4(7) . . ? 
N2 C23 C24 114.0(5) . . ? 
N2 C23 H23A 108.7 . . ? 
C24 C23 H23A 108.7 . . ? 
N2 C23 H23B 108.7 . . ? 
C24 C23 H23B 108.7 . . ? 
H23A C23 H23B 107.6 . . ? 
O20 C24 O21 122.9(6) . . ? 
O20 C24 C23 120.9(6) . . ? 
O21 C24 C23 116.2(6) . . ? 
 
loop_ 
 _geom_torsion_atom_site_label_1 
 _geom_torsion_atom_site_label_2 
 _geom_torsion_atom_site_label_3 
 _geom_torsion_atom_site_label_4 
 _geom_torsion 
 _geom_torsion_site_symmetry_1 
 _geom_torsion_site_symmetry_2 
 _geom_torsion_site_symmetry_3 
 _geom_torsion_site_symmetry_4 
 _geom_torsion_publ_flag 
O17 Zn1 O1 C8 114.9(5) 2_666 . . . ? 
O21 Zn1 O1 C8 -130.7(5) 2_556 . . . ? 
O3 Zn1 O1 C8 -24.3(8) . . . . ? 
N1 Zn1 O1 C8 10.5(5) . . . . ? 
O17 Zn1 O3 C10 -115.6(5) 2_666 . . . ? 
O21 Zn1 O3 C10 133.5(5) 2_556 . . . ? 
O1 Zn1 O3 C10 26.7(8) . . . . ? 
N1 Zn1 O3 C10 -8.1(5) . . . . ? 
O6 Zn2 O4 C10 76.7(7) . . . . ? 
O6 Zn2 O4 C10 -103.3(7) 2 . . . ? 
O5 Zn2 O4 C10 168.4(7) 2 . . . ? 
O5 Zn2 O4 C10 -11.6(7) . . . . ? 
O8 Zn3 O7 C11 -90.2(4) . . . . ? 
O19 Zn3 O7 C11 170.6(4) 2_666 . . . ? 
O20 Zn3 O7 C11 41.9(6) 2_666 . . . ? 
O9 Zn3 O7 C11 -5.2(4) . . . . ? 
N2 Zn3 O7 C11 95.3(4) 2_666 . . . ? 
O8 Zn3 O9 C11 107.9(4) . . . . ? 
O19 Zn3 O9 C11 -5.5(7) 2_666 . . . ? 
O20 Zn3 O9 C11 -153.1(4) 2_666 . . . ? 
O7 Zn3 O9 C11 5.2(4) . . . . ? 
N2 Zn3 O9 C11 -74.3(4) 2_666 . . . ? 
O14 Zn4 O10 C12 -153.3(4) . . . . ? 
O2 Zn4 O10 C12 46.5(5) 2_556 . . . ? 
O12 Zn4 O10 C12 -61.2(5) . . . . ? 
O13 Zn4 O10 C12 124.1(5) . . . . ? 
O11 K1 O11 C12 -171.6(6) 2_556 . . . ? 
O16 K1 O11 C12 -32.6(5) 2_666 . . . ? 
O22 K1 O11 C12 71.9(5) 2_656 . . . ? 
O12 K1 O11 C12 -138.9(5) 2_556 . . . ? 
O22 K1 O11 C12 76.0(6) . . . . ? 
Zn4 K1 O11 C12 -135.8(5) 2_556 . . . ? 
O11 K1 O11 K1 0.0 2_556 . . 2_556 ? 
O16 K1 O11 K1 139.05(18) 2_666 . . 2_556 ? 
O22 K1 O11 K1 -116.5(2) 2_656 . . 2_556 ? 
O12 K1 O11 K1 32.7(3) 2_556 . . 2_556 ? 
O22 K1 O11 K1 -112.4(3) . . . 2_556 ? 
Zn4 K1 O11 K1 35.86(16) 2_556 . . 2_556 ? 
O14 Zn4 O12 K1 -144.0(2) . . . 2_556 ? 
O10 Zn4 O12 K1 83.0(2) . . . 2_556 ? 
O2 Zn4 O12 K1 -38.7(2) 2_556 . . 2_556 ? 
O10 Zn4 O14 C19 -32.2(7) . . . . ? 
O2 Zn4 O14 C19 130.0(6) 2_556 . . . ? 
O12 Zn4 O14 C19 -127.5(6) . . . . ? 
O13 Zn4 O14 C19 51.7(6) . . . . ? 
O11 K1 O22 K1 -102.5(2) 2_556 . . 2_656 ? 
O16 K1 O22 K1 113.3(2) 2_666 . . 2_656 ? 
O22 K1 O22 K1 0.0 2_656 . . 2_656 ? 
O12 K1 O22 K1 -159.1(2) 2_556 . . 2_656 ? 
O11 K1 O22 K1 -4.2(4) . . . 2_656 ? 
O17 Zn1 N1 C5 -12.3(4) 2_666 . . . ? 
O21 Zn1 N1 C5 179.6(3) 2_556 . . . ? 
O1 Zn1 N1 C5 96.1(4) . . . . ? 
O3 Zn1 N1 C5 -99.9(4) . . . . ? 
O17 Zn1 N1 C7 -132.3(4) 2_666 . . . ? 
O21 Zn1 N1 C7 59.6(5) 2_556 . . . ? 
O1 Zn1 N1 C7 -23.9(4) . . . . ? 
O3 Zn1 N1 C7 140.1(4) . . . . ? 
O17 Zn1 N1 C9 109.6(4) 2_666 . . . ? 
O21 Zn1 N1 C9 -58.5(5) 2_556 . . . ? 
O1 Zn1 N1 C9 -142.0(4) . . . . ? 
O3 Zn1 N1 C9 22.0(4) . . . . ? 
C6 C1 C2 C3 1.9(10) . . . . ? 
C11 C1 C2 C3 -173.5(6) . . . . ? 
C1 C2 C3 C4 -0.7(10) . . . . ? 
C1 C2 C3 C12 177.5(6) . . . . ? 
C2 C3 C4 C5 -1.6(10) . . . . ? 
C12 C3 C4 C5 -179.9(6) . . . . ? 
C3 C4 C5 C6 2.6(10) . . . . ? 
C3 C4 C5 N1 179.4(6) . . . . ? 
C7 N1 C5 C4 15.3(9) . . . . ? 
C9 N1 C5 C4 149.0(6) . . . . ? 
Zn1 N1 C5 C4 -96.7(6) . . . . ? 
C7 N1 C5 C6 -167.9(6) . . . . ? 
C9 N1 C5 C6 -34.2(8) . . . . ? 
Zn1 N1 C5 C6 80.0(6) . . . . ? 
C2 C1 C6 C5 -0.9(10) . . . . ? 
C11 C1 C6 C5 174.6(6) . . . . ? 
C4 C5 C6 C1 -1.3(9) . . . . ? 
N1 C5 C6 C1 -178.2(6) . . . . ? 
C5 N1 C7 C8 -82.9(7) . . . . ? 
C9 N1 C7 C8 143.0(6) . . . . ? 
Zn1 N1 C7 C8 33.1(6) . . . . ? 
Zn1 O1 C8 O2 -176.4(5) . . . . ? 
Zn1 O1 C8 C7 6.7(8) . . . . ? 
Zn4 O2 C8 O1 -15.4(10) 2_556 . . . ? 
Zn4 O2 C8 C7 161.6(4) 2_556 . . . ? 
N1 C7 C8 O1 -30.6(8) . . . . ? 
N1 C7 C8 O2 152.2(6) . . . . ? 
C5 N1 C9 C10 85.2(7) . . . . ? 
C7 N1 C9 C10 -141.2(6) . . . . ? 
Zn1 N1 C9 C10 -32.1(6) . . . . ? 
Zn2 O4 C10 O3 -18.8(11) . . . . ? 
Zn2 O4 C10 C9 161.5(5) . . . . ? 
Zn1 O3 C10 O4 171.4(5) . . . . ? 
Zn1 O3 C10 C9 -8.9(8) . . . . ? 
N1 C9 C10 O4 -149.6(6) . . . . ? 
N1 C9 C10 O3 30.7(9) . . . . ? 
Zn3 O7 C11 O9 8.9(6) . . . . ? 
Zn3 O7 C11 C1 -166.4(6) . . . . ? 
Zn3 O9 C11 O7 -9.0(6) . . . . ? 
Zn3 O9 C11 C1 166.4(5) . . . . ? 
C2 C1 C11 O7 171.8(6) . . . . ? 
C6 C1 C11 O7 -3.8(10) . . . . ? 
C2 C1 C11 O9 -3.6(10) . . . . ? 
C6 C1 C11 O9 -179.1(6) . . . . ? 
K1 O11 C12 O10 76.5(10) 2_556 . . . ? 
K1 O11 C12 O10 -115.7(7) . . . . ? 
K1 O11 C12 C3 -104.3(8) 2_556 . . . ? 
K1 O11 C12 C3 63.5(7) . . . . ? 
Zn4 O10 C12 O11 -9.2(9) . . . . ? 
Zn4 O10 C12 C3 171.6(5) . . . . ? 
C2 C3 C12 O11 -168.7(7) . . . . ? 
C4 C3 C12 O11 9.5(10) . . . . ? 
C2 C3 C12 O10 10.5(10) . . . . ? 
C4 C3 C12 O10 -171.3(6) . . . . ? 
C18 C13 C14 C15 1.6(10) . . . . ? 
C19 C13 C14 C15 -174.8(6) . . . . ? 
C13 C14 C15 C16 -1.1(10) . . . . ? 
C13 C14 C15 C20 178.4(6) . . . . ? 
C14 C15 C16 C17 -1.5(10) . . . . ? 
C20 C15 C16 C17 178.9(6) . . . . ? 
C15 C16 C17 C18 3.5(10) . . . . ? 
C15 C16 C17 N2 -179.9(6) . . . . ? 
C23 N2 C17 C16 145.1(6) . . . . ? 
C21 N2 C17 C16 13.9(9) . . . . ? 
Zn3 N2 C17 C16 -100.6(6) 2_666 . . . ? 
C23 N2 C17 C18 -38.3(8) . . . . ? 
C21 N2 C17 C18 -169.4(6) . . . . ? 
Zn3 N2 C17 C18 76.0(6) 2_666 . . . ? 
C16 C17 C18 C13 -3.0(10) . . . . ? 
N2 C17 C18 C13 -179.8(6) . . . . ? 
C14 C13 C18 C17 0.5(10) . . . . ? 
C19 C13 C18 C17 176.9(6) . . . . ? 
Zn4 O14 C19 O15 31.5(11) . . . . ? 
Zn4 O14 C19 C13 -144.8(5) . . . . ? 
C14 C13 C19 O15 -2.1(11) . . . . ? 
C18 C13 C19 O15 -178.5(7) . . . . ? 
C14 C13 C19 O14 174.5(6) . . . . ? 
C18 C13 C19 O14 -1.9(10) . . . . ? 
K1 O16 C20 O17 122.9(8) 2_666 . . . ? 
K1 O16 C20 C15 -59.3(11) 2_666 . . . ? 
Zn1 O17 C20 O16 -38.3(9) 2_666 . . . ? 
Zn1 O17 C20 C15 143.9(5) 2_666 . . . ? 
C14 C15 C20 O16 3.7(10) . . . . ? 
C16 C15 C20 O16 -176.8(7) . . . . ? 
C14 C15 C20 O17 -178.3(6) . . . . ? 
C16 C15 C20 O17 1.2(10) . . . . ? 
C17 N2 C21 C22 -161.7(6) . . . . ? 
C23 N2 C21 C22 66.4(7) . . . . ? 
Zn3 N2 C21 C22 -41.3(6) 2_666 . . . ? 
Zn3 O19 C22 O18 -178.0(6) 2_666 . . . ? 
Zn3 O19 C22 C21 1.5(9) 2_666 . . . ? 
N2 C21 C22 O18 -148.9(7) . . . . ? 
N2 C21 C22 O19 31.6(9) . . . . ? 
C17 N2 C23 C24 94.2(6) . . . . ? 
C21 N2 C23 C24 -132.4(6) . . . . ? 
Zn3 N2 C23 C24 -25.6(6) 2_666 . . . ? 
Zn3 O20 C24 O21 -170.5(5) 2_666 . . . ? 
Zn3 O20 C24 C23 9.0(8) 2_666 . . . ? 
Zn1 O21 C24 O20 -7.2(8) 2_556 . . . ? 
Zn1 O21 C24 C23 173.3(4) 2_556 . . . ? 
N2 C23 C24 O20 14.8(9) . . . . ? 
N2 C23 C24 O21 -165.6(5) . . . . ? 
 
loop_ 
 _geom_hbond_atom_site_label_D 
 _geom_hbond_atom_site_label_H 
 _geom_hbond_atom_site_label_A 
 _geom_hbond_distance_DH 
 _geom_hbond_distance_HA 
 _geom_hbond_distance_DA 
 _geom_hbond_angle_DHA 
 _geom_hbond_site_symmetry_A 
O22 H22A O2  0.86 2.23 2.953(8) 141 1_655 
O22 H22B O15  0.87 2.13 2.815(8) 136 1_545 
O8 H5 O18  0.86 1.89 2.696(7) 156 1_554 
O8 H8 O21  0.85 2.14 2.978(7) 174 2_566 
O13 H13A O23  0.87 1.93 2.793(7) 171 2_666 
O12 H12A O15  0.86 1.90 2.651(7) 146 2_566 
O13 H13B O22  0.89 2.57 3.192(8) 128 2_656 
O13 H13B O15  0.89 2.59 3.367(8) 147 2_666 
O5 H5B O18  0.91 2.02 2.884(8) 158 1_544 
O5 H5A O3  0.89 1.86 2.726(7) 163 . 
O6 H6A O24  0.87 1.85 2.683(9) 161 1_445 
O6 H6B O7  0.90 1.84 2.691(7) 157 2 
O23 H23D O16  0.88 2.02 2.851(7) 159 2_676 
O24 H24A O3  0.90 2.54 3.239(10) 136 1_665 
O24 H24B O24  0.88 2.58 3.11(2) 120 2_765 
 
_diffrn_measured_fraction_theta_max    0.986 
_diffrn_reflns_theta_full              27.48 
_diffrn_measured_fraction_theta_full   0.986 
_refine_diff_density_max    0.674 
_refine_diff_density_min   -0.970 
_refine_diff_density_rms    0.158 
